# Supplementary material
Source: PubMed Central journal article supplement (PMC3605961)

## SUPPLEMENTARY DATA

FIG. S1. Frequency of occurrence and fruit set of arctic bramble in Finland, before and up to 1930. I = generally very common and setting fruit richly (optimal zone); II = common and usually setting fruit; III = fairly common but sets fruit only occasionally; IV = rare. The origin of cultivars used in this study is displayed with letters as follows: A = Mespī; B = Mesma; C = Elpee; D = Marika; E = Muuruska; F = Susanna. (Modified from Saastamoinen, 1930, and Tammissola, 1988; see reference list in main text).

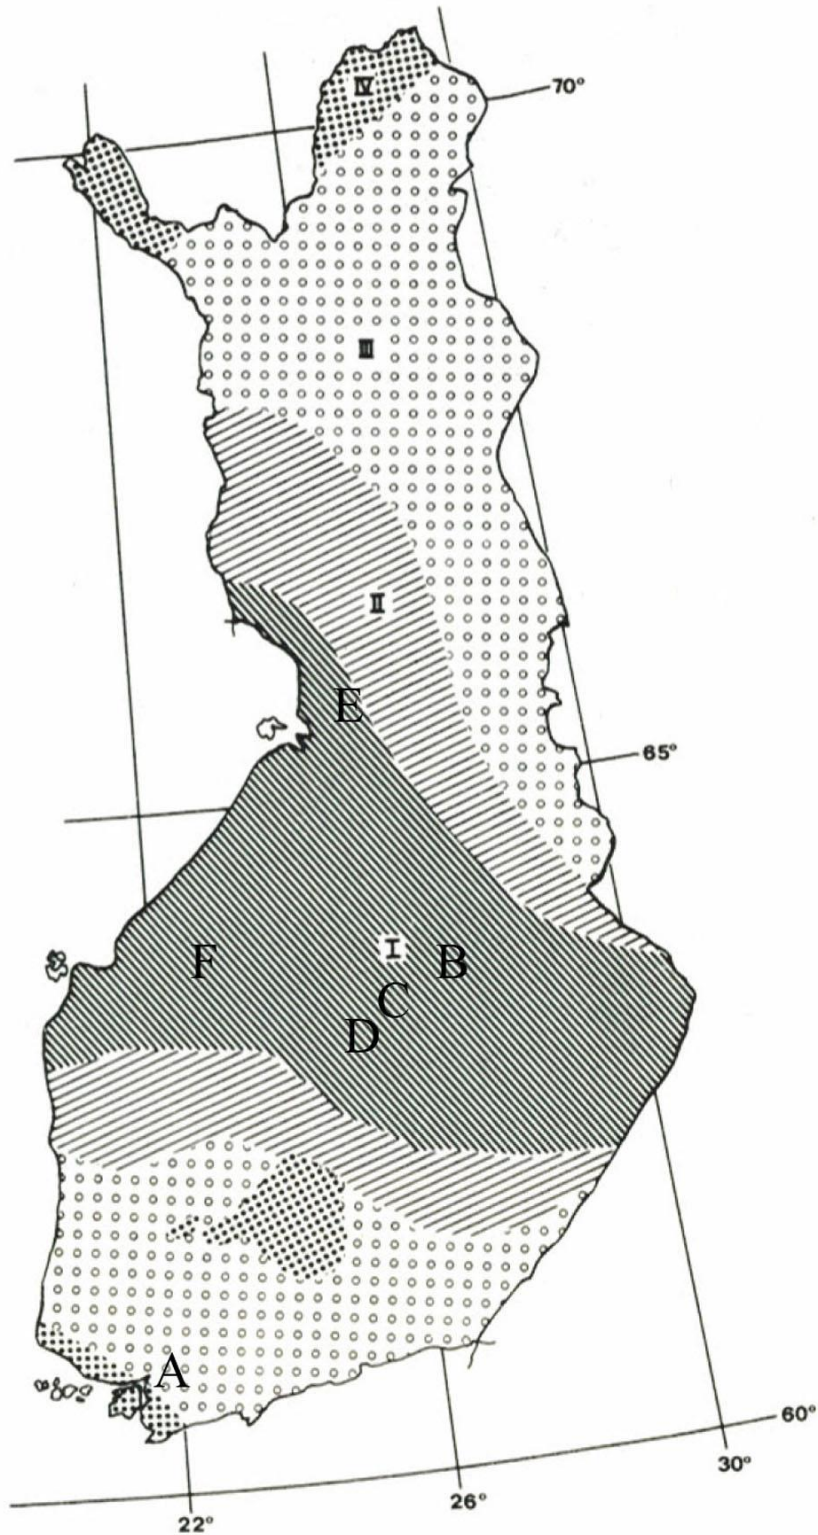

Supplement: supp_mct029_mct029supp.pdf [file supp_mct029_mct029supp.pdf]
